# Supplementary material for: Understanding Antimicrobial Use Contexts in the Poultry Sector: Challenges for Small-Scale Layer Farms in Kenya
Source: MDPI journal article supplement (doi:10.3390/antibiotics10020106), 2021-01-22
Supplement: s1 [file s1]

## FINAL\_KAP\_SURVEY\_GATUNDU

### Study Introduction

We are interested in knowing how you manage your farm and we want to know this because we want to develop a program to help you improve the health of your animals

This survey will take between 1 hr and 1.5hrs of your time

You do not have to agree to be interviewed and you can stop at any time choose and there will be no negative consequences for you

Anything you say during the discussion today will remain completely confidential: your name will not be used in any materials produced from this study nor any other information that could be used to identify me

You can request access to, moderations to, and/or deletion of my personal data.

### Informed Consent

The study has been explained to me in a language that I comprehend. All the questions I had about the study have been answered.

I have been informed that it is my right to refuse to participate today and that if I choose to refuse I do not have to give a reason, and there will be no negative consequences for me.

I have been informed that anything I say during the discussion today will remain completely confidential: my name will not be used in any materials produced from this study nor any other information that could be used to identify me

I have been informed that I can request access to, moderations to, and/or deletion of my personal data.

I release FAO and its employees dealing with the use of my personal data as described above.

### I agree to take part of this study

☐ Yes

☐ No

**Please have them sign**

**1) Please Check Your Name**

- ☐ [REDACTED]

**2) Select Ward where interview will take place**

- ☐ [REDACTED]
- ☐ [REDACTED]
- ☐ [REDACTED]
- ☐ [REDACTED]

**3) Write name of the village**

---

**4) Household ID**

---

**5) What is your name?**

---

**6) What is your role in this farm?***Remember, try your best to interview owner*

- ☐ farm owner
- ☐ spouse of farm owner
- ☐ son or daughter of farm owner
- ☐ farm manager
- ☐ employee that is not a manager

**7) What year were you born?***Respondent*

---

**8) Record gender of respondent**

- ☐ Male
- ☐ Female

**9) What is gender of farm owner?**

- ☐ Male
- ☐ Female

**10) What year was farm owner born?**

---

**11) What is the owner's highest level of formal education?**

- ☐ None
- ☐ Uncompleted Primary School
- ☐ Completed Primary Level
- ☐ Uncompleted Secondary Level
- ☐ Completed Secondary Level
- ☐ Uncompleted Tertiary Level
- ☐ Completed Tertiary Level
- ☐ Don't Know

**12) What languages does the household read?**

- ☐ English
- ☐ Kikuyu
- ☐ Kiswahili
- ☐ I don't read

**13) What is your main occupation?**

- ☐ Farmer
- ☐ Formal employment
- ☐ Informal employment
- ☐ Student
- ☐ Retired
- ☐ Other (specify)
- ☐ Other

Specify other.

---

**14) How many people live on the farm?**

---

**15) How many employees does the farm have?**

---

Now, I will give you a list of animals. I will ask you to tell me how many are at the house and whether they are in a pen or free-ranging

**16) How many dairy cattle does the household have?**

---

**17) Are your dairy cattle?**

- ☐ Free Range
- ☐ Confined
- ☐ Partially confined

**18) How many beef cattle do you have?**

---

**19) Are your beef cattle?**

- ☐ Free Range
- ☐ Confined
- ☐ Partially confined



**20) How many sheep do you have?**

---

**21) Are your sheep?**

- ☐ Free Range
- ☐ Confined
- ☐ Partially confined

**22) How many goats do you have?**

---

**23) Are your goats?**

- ☐ Free Range
- ☐ Confined
- ☐ Partially confined

**24) How many pigs do you have?**

---

**25) Are your pigs?**

- ☐ Free Range
- ☐ Confined
- ☐ Partially confined

**26) How many dogs do you have?**

---

**27) How many rabbits do you have?**

---

**28) How many geese do you have?**

---

**29) Are your geese?**

- ☐ Free Range
- ☐ Confined
- ☐ Partially confined

**30) How many ducks do you have?**

---

**31) Are your ducks?**

- ☐ Free Range
- ☐ Confined
- ☐ Partially confined

**32) How many turkeys do you have?**

---

**33) Are your turkeys?**

- ☐ Free Range
- ☐ Confined
- ☐ Partially confined

**34) How many indigenous chickens do you have?**

---

**35) Are your indigenous chickens?**

- ☐ Free Range
- ☐ Confined
- ☐ Partially confined

**36) How many guinea\_fowl do you have?**

---

**37) Are your guinea\_fowl?**

- ☐ Free Range
- ☐ Confined
- ☐ Partially confined

**38) How many broilers do you have?**

---

**39) Are your broilers?**

- ☐ Free Range
- ☐ Confined
- ☐ Partially confined

**Now, I'd like to ask some questions specific to layers****What is the main reason you keep layers?**

- ☐ Commercial (market oriented)
- ☐ Subsistence (own consumption and some income)
- ☐ Hobby

**40) How are your layers kept?**

- ☐ Cage System
- ☐ Deep Litter
- ☐ Semi-intensive

**41) How many brooders (0-8 weeks) do you have?**

---

**42) How many pullets/growers (9-18 weeks) do you have?**

---

**43) How many layers (19-75 weeks) do you have?**

---

**44) How many spent layers (>75 weeks) do you have?**

---

**45) Do you keep multiple ages of layers at the same time?**

- ☐ Yes
- ☐ No

**46) How are multiple ages kept?**

- ☐ I keep multiple ages in separate houses
- ☐ I keep multiple ages in the same house but separated by A BARRIER
- ☐ I keep multiple ages in the same house but with NO BARRIER

**47) Do you keep other types of poultry in layer houses?**

☐ Yes

☐ No

**48) If yes, what type of poultry?**

☐ Broilers

☐ Cocks

☐ Improved indigenous chicken (kienyeji)

**49) About how many years or months have you been keeping layers?**

*Remember to put UNITS (years or months)*

---

Now, I'll ask you a few questions on bird mortality and production costs. ASK THEM FOR COSTS FOR LAST PRODUCTION CYCLE OR current production cycle if they have not completed a full cycle

**50) Can you estimate the money the farm spent on medicine/vaccines/and disinfectants the last production cycle?**

☐ Yes

☐ No

**Could you provide an estimate of the following:**

**51) Number of birds that died during last production cycle or current production cycle if they have not completed a full cycle**

---

**52) Lump sum costs of vaccination during last production cycle or current production cycle if they have not completed a full cycle**

*In Kshillings. Write DK if DON'T KNOW*

---

**53) Lump sum costs of medicines during last production cycle**

*In Kshillings. Write DK if DON'T KNOW*

---

**54) Lump sum costs of egg boosters during last production cycle or current production cycle if they have not completed a full cycle**

*In Kshillings. Write DK if DON'T KNOW*

---

**55) Lump sum costs of feed during last production cycle or current production cycle if they have not completed a full cycle**

*In Kshillings. Write DK if DON'T KNOW*

---

**56) Lump sum costs of disinfectants during last production cycle or current production cycle if they have not completed a full cycle**

*In Kshillings. Write DK if DON'T KNOW*

---

**57) What is your USUAL starter flock?**

- ☐ Day old chicks
- ☐ Grower/pullets
- ☐ Other

**Specify other.**

---

**58) What is the source of your starter flock (day-old chicks/grower stock) SELECT ALL**

- ☐ Directly from the Hatchery
- ☐ Agroveter
- ☐ Other Farmers
- ☐ Trader/Broker
- ☐ Other

**Specify other.**

---

**59) Does your starter flock come vaccinated against some diseases?**

- ☐ yes
- ☐ no
- ☐ Don't Know

**60) What do you get with your starter flock package? SELECT ALL**

- ☐ Chicks
- ☐ Feed
- ☐ Medicine
- ☐ Vaccines
- ☐ Multivitamins
- ☐ Liquid Paraffin
- ☐ Glucose
- ☐ Other

Specify other.

---

**Now, I would like to ask you a few questions about the health of your poultry**

**61) What are the most common DISEASE SYMPTOMS your layers show? Please Select All***Symptoms listed in alphabetical order*

- ☐ Abnormal eggs (small/large/round, thin/rough shell, )
- ☐ Blindness
- ☐ Bloody Droppings/Diarrhea
- ☐ circling
- ☐ Diarrhea
- ☐ Discharge from Eyes
- ☐ Drop in Egg Production
- ☐ Dullness
- ☐ Lameness
- ☐ Lesions on skin
- ☐ Paralysis
- ☐ Pecking each other
- ☐ Sleepiness
- ☐ Sneezing
- ☐ Snoring
- ☐ Sudden Death
- ☐ stargazing
- ☐ Swollen Eyes
- ☐ twisted neck
- ☐ White Diarrhea
- ☐ Wounds where the egg comes out
- ☐ Yellow/brown diarrhea
- ☐ Other

**Specify other.**  

---

**62) What are the most common diseases your layers get? Please Select All**

- ☐ Coccidiosis
- ☐ Coryza
- ☐ CRD (Chronic Respiratory Disease)
- ☐ Egg Perinosis
- ☐ Fowl Pox
- ☐ Fowl typhoid
- ☐ Gumboro Disease
- ☐ I don't know any diseases
- ☐ Infectious Bronchitis
- ☐ Marek's Disease
- ☐ My birds never get disease
- ☐ Newcastle Disease (kihuruto)
- ☐ Worms

**63) Where do you mostly obtain INFORMATION/ADVICE on disease treatment for your sick layers?**

- ☐ Other farmers
- ☐ Government vet services
- ☐ Private vet services
- ☐ Veterinary laboratory
- ☐ Agroveter
- ☐ Manufacturers
- ☐ I never get advice because I know what to do

**Please think about when your layers need to be treated****64) How often do these people give you advice/instructions on bird health**

never

rarely

sometimes

almost always

**65) Family/friends**☐☐☐☐**66) NGOs**☐☐☐☐**67) agroveter**☐☐☐☐**68) feed or drug distributor**☐☐☐☐**69) a government veterinarian**☐☐☐☐**70) a private veterinarian**☐☐☐☐**71) a vet laboratory**☐☐☐☐



**72) How often do you take samples/sick birds to a veterinarian for diagnosis?**

- ☐ never/rarely
- ☐ Sometimes
- ☐ Always whenever disease strikes

**73) What challenges do you face in trying to get veterinary health services? Select All**

- ☐ High Cost
- ☐ Distance
- ☐ Too few services
- ☐ Lack of follow-up
- ☐ Existence of Quacks
- ☐ SLOW response time/turn around
- ☐ NO RESPONSE
- ☐ No challenges

**74) What challenges do you face in trying to get diagnosis at a veterinary laboratory? Select All**

- ☐ High Cost
- ☐ Distance to Lab
- ☐ Not aware of lab
- ☐ Don't know what to take to lab
- ☐ Slow Services
- ☐ No challenges

**75) Are there some medicines that used to work in the past that are not as effective at treating diseases in the present?**

- ☐ yes
- ☐ no
- ☐ I don't know
- ☐ I don't use medicine

**76) Why do you believe the medicines are less effective?**

---

**77) What do you do when you observe that the medicines you used regularly on your birds are no longer effective?**

- ☐ Try a different antibiotic
- ☐ Increase drug dosage
- ☐ Combine with other drugs
- ☐ Consult with animal health professional
- ☐ Shift to herbal medicine

**78) Do you know what antibiotics are?**

- ☐ Yes
- ☐ No

**79) Select Their Answers (DO NOT LIST BUT SELECT ALL)**

- ☐ medicine that PREVENTS diseases
- ☐ medicine that KILLS disease
- ☐ medicine that KILLS germs
- ☐ medicines that KILL bacteria
- ☐ medicines that PROMOTE GROWTH
- ☐ medicine increases EGG LAYING
- ☐ medicine that KILLS VIRUSES
- ☐ Other

**Specify other.**

---

**80) Where do you USUALLY get your antibiotics from?**

- ☐ agrovet
- ☐ government vet/paravet
- ☐ private vet/paravet
- ☐ a friend
- ☐ a feed distributor
- ☐ middlemen
- ☐ I've never purchased antibiotics
- ☐ Other

**Specify other.**

---

**81) Think about when you purchase antibiotics, how does it USUALLY happen?**

- ☐ I know what I need and I just tell the them the medicine name and they don't give me INTRUCTIONS ON USE
- ☐ I know what I need and I just tell the them the medicine name and they GIVE ME INTRUCTIONS ON USE
- ☐ I tell them symptoms of my birds and they tell me the antibiotic I need but NO INSTRUCTIONS ON USE
- ☐ I tell them the symptoms of my birds and they tell me the antibiotic I need and INSTRUCTIONS ON USE
- ☐ I take a sick bird to the agrovet and they tell me the antibiotics
- ☐ I never purchase antibiotics

**82) When you buy antibiotics, do you usually have a prescription/or does veterinarian bring?**

- ☐ never
- ☐ rarely
- ☐ sometimes
- ☐ almost always

**83) When you buy antibiotics, does the SELLER require you to have a prescription?**

- ☐ never
- ☐ rarely
- ☐ sometimes
- ☐ almost always

**84) Why did you usually not have a prescription?**

---

**85) Think about YOUR LAYERS, how often are they given antibiotics in one month?**

- ☐ Never
- ☐ One or Two
- ☐ 3 to 5 times
- ☐ 6 to 10 times
- ☐ Over 10 times

**86) Think about ALL YOUR ANIMALS and YOUR FAMILY, how often are they given or taken antibiotics in one month?**

- ☐ Never
- ☐ One or Two
- ☐ 3 to 5 times
- ☐ 6 to 10 times
- ☐ Over 10 times

**87) Please list all the reasons you use antibiotics on your animals? Please Select All**

- ☐ To help sick animals get better
- ☐ To PREVENT A GROUP OF ANIMALS from getting sick from other animals
- ☐ To PREVENT A SINGLE ANIMAL from getting sick
- ☐ To help animals GROW FASTER
- ☐ To help animals GROW BIGGER
- ☐ To help birds LAY MORE EGGS
- ☐ I don't use antibiotics on animals
- ☐ Other

Specify other.

**Now, FOR YOUR BIRDS, please think about when give antibiotics****How often do the following people administer antibiotics?**

|                                      | never                 | rarely                | sometimes             | almost always         |
|--------------------------------------|-----------------------|-----------------------|-----------------------|-----------------------|
| 88) Farm Owner                       | <input type="radio"/> | <input type="radio"/> | <input type="radio"/> | <input type="radio"/> |
| 89) Family or Friends of Farm Owners | <input type="radio"/> | <input type="radio"/> | <input type="radio"/> | <input type="radio"/> |
| 90) Farm Manager                     | <input type="radio"/> | <input type="radio"/> | <input type="radio"/> | <input type="radio"/> |
| 91) Agroveter                        | <input type="radio"/> | <input type="radio"/> | <input type="radio"/> | <input type="radio"/> |
| 92) Feed Company Person              | <input type="radio"/> | <input type="radio"/> | <input type="radio"/> | <input type="radio"/> |
| 93) Extension worker                 | <input type="radio"/> | <input type="radio"/> | <input type="radio"/> | <input type="radio"/> |
| 94) Govt. Vet                        | <input type="radio"/> | <input type="radio"/> | <input type="radio"/> | <input type="radio"/> |
| 95) Priv. Vet                        | <input type="radio"/> | <input type="radio"/> | <input type="radio"/> | <input type="radio"/> |
| 96) Vet lab worker                   | <input type="radio"/> | <input type="radio"/> | <input type="radio"/> | <input type="radio"/> |

**96) Do you give antibiotics when you get your day-old chicks?**

- ☐ never
- ☐ rarely
- ☐ sometimes
- ☐ almost always

**97) When a few of your birds get sick do you usually give medicine to all of them (for example, in a drinker)?**

- ☐ never
- ☐ rarely
- ☐ sometimes
- ☐ almost always

**98) Do you use an isolation chamber when a few of your birds are sick?**

- ☐ never
- ☐ rarely
- ☐ sometimes
- ☐ almost always

**99) Do you use human medicines to treat your birds?**

- ☐ never
- ☐ sometimes
- ☐ almost always
- ☐ don't know

**100) What medicines are they?**

---

**101) Do you ever give birds a LARGER DOSE than the recommended dose?**

- ☐ never
- ☐ rarely
- ☐ sometimes
- ☐ almost always

**102) Briefly record why they DO give a larger dose**

---

**103) Do you ever give birds a SMALLER DOSE than the recommended dose?**

- ☐ never
- ☐ rarely
- ☐ sometimes
- ☐ almost always

104) Briefly record why they DO give a smaller dose

---

105) Do you ever STOP using medicine before the full dose because the animal has improved?

- ☐ never
- ☐ rarely
- ☐ sometimes
- ☐ almost always

106) Do you ever use expired medicines?

- ☐ never
- ☐ rarely
- ☐ sometimes
- ☐ almost always

107) Why do you use expired drugs?

---

108) If the antibiotics you have become expired, what do you USUALLY do with them?

- ☐ Will use them until they are finished
- ☐ Will not use them and bury
- ☐ Throw away in latrine
- ☐ Throw away in refuse pit
- ☐ Return them back to where you bought them
- ☐ I've never had drugs expire
- ☐ Other

Specify other.

---

**109) When a bird has died, what do you USUALLY do with it?**

- ☐ Consume at home
- ☐ Sell it
- ☐ Throw it in a refuse pit
- ☐ Throw it in a pit latrine
- ☐ Give it to dogs
- ☐ Bury it
- ☐ Share with neighbors and friends
- ☐ Burn it
- ☐ Other

Specify other.

---

**110) Have you ever heard about "antibiotic resistance" or "antimicrobial resistance"?**

- ☐ Yes
- ☐ No

**111) How much do you believe antibiotic or antimicrobial resistance will impact you, your family/friends, and your animals?**

- ☐ no impact
- ☐ a little impact
- ☐ a large impact
- ☐ I don't know about AMR

**112) HOW do you think antibiotic/antimicrobial resistance will impact your livelihood?**

- ☐ Loss of animals/money from farming
- ☐ Loss of human life (you, your family, your friends, your community)
- ☐ Other

Specify other.

---

**113) Who told you about antibiotic/antimicrobial resistance?**

- ☐ Friend or Neighbor
- ☐ Family Member
- ☐ Farm Manager
- ☐ Caretaker
- ☐ Poultry Drug Shop Employee
- ☐ Feed Company Person
- ☐ Extension worker
- ☐ Govt. Vet
- ☐ Priv. Vet
- ☐ Vet lab worker
- ☐ Radio
- ☐ Print Media
- ☐ I don't know about antibiotic or antimicrobial resistance
- ☐ I learned about antimicrobial resistant when I gave my chicken medicine and they did not recover

NOW, I WILL READ YOU A SET OF STATEMENTS AND ASK YOU HOW MUCH YOU AGREE WITH THEM. I'll ask whether you agree, neither agree nor disagree, or disagree

**AGREE****114) How much do you agree with the statement that "You can stop giving an animal a full course of antibiotic if their symptoms are improving."**

- ☐ agree
- ☐ I'm not sure
- ☐ disagree

**115) How much do you agree with the statement that "if medicines are given TOO OFTEN then they might stop working?"**

- ☐ agree
- ☐ I'm not sure
- ☐ disagree

**116) How much do you agree with the statement that "giving animals that are not sick antibiotics will PREVENT THEM FROM BECOMING SICK in the future"**

- ☐ agree
- ☐ I'm not sure
- ☐ disagree



**117) How much do you agree with the statement that "giving animals antibiotics can help them GROW BIGGER, FASTER, FATTER, boost egg production/size"**

- ☐ agree
- ☐ I'm not sure
- ☐ disagree

**118) How much do you agree with the statement that "it is important to get CONSULTATION FROM A VETERINARIAN before giving antibiotics to the animals?"**

- ☐ agree
- ☐ I'm not sure
- ☐ disagree

**119) How much do you agree with the statement that "after using antibiotics on an animal, you should WAIT sometime before using the PRODUCTS from it, such as bird meat/eggs/milk"**

- ☐ agree
- ☐ I'm not sure
- ☐ disagree

**120) Can animals and animal products from sick animals transmit disease to humans?**

- ☐ yes
- ☐ no
- ☐ Don't Know

**121) Do you know what antibiotic residues are?**

- ☐ Yes
- ☐ No

**122) What do you USUALLY do with EGGS under CURRENT TREATMENT with antibiotics/antimicrobials or during WITHDRAWAL PERIOD?**

- ☐ Consume at home
- ☐ Sell it
- ☐ Throw it in a refuse pit
- ☐ Throw it in a pit latrine
- ☐ Give it to dogs
- ☐ Bury it
- ☐ Share with neighbors and friends
- ☐ Burn it

**123) Has an animal health worker/poultry drug shop/veterinarian/NGO ever told you about withdrawal periods: that is, you have to wait to sell the animal or eat a meat/egg/milk after giving the animal medicine?**

☐ Yes

☐ No

**Now, I'd like to ask some questions about vaccines**

**124) Do you know what vaccines (chanjo) are?**

*If they say something like "PREVENT DISEASE LONG TERM" check yes*

☐ Yes

☐ No

**125) What vaccines do you give to your layers? Please Select ALL**

- ☐ Newcastle
- ☐ Newcastle Plus IB
- ☐ Gumboro
- ☐ Fowl typhoid
- ☐ Fowl pox
- ☐ Marek's Disease
- ☐ Don't know
- ☐ Other

**Specify other.**

---

**126) What vaccines do you give to your OTHER BIRD (broilers/indigenous)? Please Select ALL**

- ☐ Coccidiosis
- ☐ Newcastle Diseases
- ☐ Gumboro Disease
- ☐ Fowl Pox
- ☐ Fowl typhoid
- ☐ Marek's Disease
- ☐ I ONLY HAVE LAYERS NOT ANY OTHER BIRDS
- ☐ None
- ☐ Other

Specify other.

---

**127) Have your layers come down with the disease they have been vaccinated for?**

- ☐ never
- ☐ rarely
- ☐ sometimes
- ☐ almost always

**128) Where do you purchase your vaccines from? Please Select ALL**

- ☐ agrovet
- ☐ government vet
- ☐ feed distributor
- ☐ private vet
- ☐ Import from outside Kenya
- ☐ friends
- ☐ farmer associations
- ☐ Pharmaceutical company

**129) Who USUALLY vaccinates the birds or layers if vaccination is GIVEN THROUGH WATER?**

- ☐ Myself
- ☐ family/friends
- ☐ government health services
- ☐ private health services
- ☐ Agrovet
- ☐ Informal private practioners

**130) Who USUALLY vaccinates the birds or layers if vaccination is given by INJECTION?**

- ☐ Myself
- ☐ family/friends
- ☐ government health services
- ☐ private health services
- ☐ Agrovet
- ☐ Informal private practioners

**131) How do you store your vaccines before use?**

- ☐ Transport in cold chain and use immediately upon purchase
- ☐ Store at room temperature and use later (at least more than 2 hours after purchase)
- ☐ Store in the refrigerator

**132) If you have extra vaccine (doses is higher than flock size) what do you do with it?**

- ☐ share it with another farmer
- ☐ discard it
- ☐ use all of it
- ☐ store to use during the next vaccination
- ☐ I always buy exact dose

**133) What challenges do you normally face with getting or administering vaccinations? Please LIST ALL CHOICES and SELECT ALL**

- ☐ Unavailability
- ☐ High Cost of professional administration
- ☐ lack of information on what vaccines and when to use (don't always know where and how to get them)
- ☐ Nobody available to give vaccine
- ☐ High cost of vaccines
- ☐ Far distance to purchase vaccines
- ☐ Don't have access to proper storage/handling
- ☐ Lack of appropriate doses
- ☐ No challenges
- ☐ Other

Specify other.

---

**134) How much do you agree with the statement that "using vaccines can prevent the use of antibiotics?"**

- ☐ agree
- ☐ I'm not sure
- ☐ disagree

Now, I'd like to take you a few pictures of your layer houses

**135) Record the number of layer houses (BUT ONLY TAKE PICTURES OF THE BIGGEST!)**  

---

**136) How many birds are in the main layer house?**

---

**137) How many weeks are the birds in the main layer house?**

---

**138) Record housing wall type of MAIN layer house**

- ☐ Iron Sheets
- ☐ Brick/Stone
- ☐ Wood/Timber
- ☐ Wire/Mesh
- ☐ Mud
- ☐ Other

**Specify other.**

---

**139) Record housing floor type of MAIN layer house**

- ☐ Earthen
- ☐ Cement/Concrete
- ☐ Wooden block (non-slatted)
- ☐ Wooden slatted floor
- ☐ Wire
- ☐ A combination of wood and wire mesh
- ☐ Other

**Specify other.**

---

**140) Record type of litter used in Main layer house**

- ☐ Straw(Grass/Wheat)
- ☐ wood shavings
- ☐ sand
- ☐ rice husks
- ☐ used paper
- ☐ none
- ☐ Other

Specify other.

---

**141) Do you treat your litter before putting it on the floor of your layer house?**

- ☐ never
- ☐ rarely
- ☐ sometimes
- ☐ almost always

**142) What do you USUALLY use to treat your litter? Select All that Apply**

- ☐ disinfectant
- ☐ Sun Drying
- ☐ Other

Specify other.

---

**143) What do you do with the used litter? Please Select All**

- ☐ Use as Livestock Feed (cattle)
- ☐ Use as Livestock Bedding
- ☐ Put into the fields compost/manure
- ☐ Sell to neighbors
- ☐ re-use
- ☐ burn
- ☐ Bury it
- ☐ Throw it away
- ☐ Other

Specify other.

---

**144) Observe and Record drinker type (the majority of drinkers)**

- ☐ Commercial plastic drinkers
- ☐ Commercial metal drinkers
- ☐ Improvised (plastic)

**145) Observe and record drinker positioning**

- ☐ Automatic drinkers
- ☐ Nipple drinkers
- ☐ Drinkers hanged above the floor
- ☐ Drinkers placed on the floor

**146) How many drinkers do you currently use in MAIN layer house?**

---

**147) Record drinker material**

- ☐ Plastic
- ☐ Metal
- ☐ Wood
- ☐ Clay
- ☐ Other

Specify other.

---

**148) Where do you USUALLY get your water for your layers? Ask about source if not treated**

- ☐ borehole
- ☐ tap water
- ☐ rain water
- ☐ river water
- ☐ hand dug well
- ☐ Water vendors
- ☐ Other

Specify other.

---

**149) How often do you USUALLY clean the drinkers?**

- ☐ Never Clean
- ☐ Daily
- ☐ Once a week
- ☐ Twice a week
- ☐ Once or twice a month
- ☐ Only after the production cycle

**150) What do you USUALLY clean your drinkers with?**

- ☐ Water Only
- ☐ Water and Soap Only
- ☐ Water and disinfectant Only
- ☐ Water, disinfectant, and Soap

**151) Observe and Record if areas around drinkers are moist**

- ☐ very damp
- ☐ somehow damp
- ☐ dry

**152) Is the availability or quality of water a source of problem in raising your bird?**

- ☐ Yes
- ☐ No

**153) Do you USUALLY treat the water before putting into drinker?**

- ☐ No, I do not USUALLY treat
- ☐ Yes, I treat with chemicals (disinfectant, chlorine)
- ☐ Yes, I boil

**154) How many feeders are in main layer house?**

---



**155) Record feeder type**

- ☐ Plastic
- ☐ Metal
- ☐ Wooden
- ☐ Rubber (tire)
- ☐ Oyster Shells

**156) How often do you USUALLY clean the feeders?**

- ☐ Never Clean
- ☐ Daily
- ☐ Once or twice a week
- ☐ Once a month
- ☐ Only after cycle ends

**157) What do you USUALLY clean your feeders with?**

- ☐ Water
- ☐ Water and Soap Only
- ☐ Water and disinfectant
- ☐ Water, disinfectant, and Soap

**158) What feed distributor do you use? Please Select All**

- ☐ Own made feeds: I mix it myself
- ☐ I bring a local company the ingredients and they mix
- ☐ Shop / kiosk
- ☐ Directly from a manufacturing company
- ☐ Distributor
- ☐ Agroveter

**159) Take photo of area where they store feed**

Click here to upload file. (< 10MB)

**160) Observe and Record how damp the area is. Is the storage area damp?**

- ☐ very damp
- ☐ somehow damp
- ☐ dry

**161) Record the quality of ventilation in layer house***Or should we ask only artificial/manual*

- ☐ Two walls open along the length of the house not the width
- ☐ 50 cm height of wall
- ☐ Gap in roof
- ☐ Structure is more than 10 meters away from other structures

**162) Do you have a tire bath at MAIN entrance?**

- ☐ Yes
- ☐ No

**163) Do you have a footbath at every entrance to LAYER HOUSE?**

- ☐ Yes
- ☐ No, I do have footbaths but not at every house
- ☐ No, I don't have ANY FOOTBATHS

**164) Record the type of footbath**

- ☐ concrete trough with water
- ☐ concrete trough with disinfectant
- ☐ mat soaked with disinfectant
- ☐ mat soaked with water
- ☐ wood shavings soaked with disinfectant
- ☐ wood shavings soaked with water
- ☐ foot dip with water
- ☐ foot dip with disinfectant

**165) How often do you change the footbath contents?**

- ☐ Every day
- ☐ Once or twice per week
- ☐ Once a month
- ☐ Never change (just fulfills when it dries up)

**166) Observe and Record if thermometer present in layer house**

- ☐ Yes
- ☐ No

**Protective Gear**

**Do you own any of these protective gear?**

I have

I use

I have for different  
houses**167) Protective boots**☐☐☐**168) Masks**☐☐☐**169) Goggles**☐☐☐**170) Gloves**☐☐☐**170) How often do you clean the protective gear?**

- ☐ after everytime entering the house
- ☐ after a few times in the poultry house
- ☐ only when dirty
- ☐ I don't have any protective gear

**171) Do people wear protective boots/slippers when they go into the layer house to get eggs, feed/give water OR ANY OTHER REASON?**

- ☐ after everytime entering the house
- ☐ after a few times in the poultry house
- ☐ only when dirty
- ☐ I don't have any protective gear

**172) Do you USUALLY clean and disinfect housing and equipment after selling a batch?**

- ☐ No
- ☐ Yes
- ☐ Not applicable, first batch

**173) How long do you USUALLY let the layer house rest before taking in the new batch?**

- ☐ no rest
- ☐ less than one week
- ☐ between 1 and 2 weeks
- ☐ about 2 weeks
- ☐ Over a month
- ☐ Not applicable, first batch

**174) Do family/friends/customers come and walk inside the layer house?**

- ☐ never
- ☐ rarely
- ☐ sometimes
- ☐ almost always

**175) Is it common for other animals to go into layer house?**

- ☐ never
- ☐ rarely
- ☐ sometimes
- ☐ almost always

**FINALLY, A FEW LAST QUESTIONS**

**176) Does anyone at the farm have any training related to animal health?**

- ☐ Yes
- ☐ No

**177) What did the trainings cover? Please Select ALL**

- ☐ record-keeping financial management marketing
- ☐ production
- ☐ animal health
- ☐ Other

**Specify other.**

---

**178) Do you take farm records? If yes, please list what types. PLEASE SELECT ALL**

- ☐ I don't keep any records
- ☐ Mortality
- ☐ Feed Records
- ☐ Medicine used
- ☐ General Financial Records
- ☐ Other

**Specify other.**

---

**179) Outreach**

**180) Can I have your phone number?**

---

**181) Do you use Whatsapp?**

☐ Yes

☐ No

**182) Is it the same number you gave previous?**

☐ Yes

☐ No

**183) Can I have your WhatsApp number**

---

**184) Where do you get general news. That is news about weather, government, etc.**

☐ Radio

☐ Internet pages

☐ Television programs

☐ Print Newspapers

☐ Fliers / paper handouts

☐ People you know

**185) Select all animal houses that are within 10 meters of the layer house**

- ☐ Broilers
- ☐ Cattle
- ☐ Ducks
- ☐ Geese
- ☐ Goats
- ☐ Guinea fowl
- ☐ Human House
- ☐ Indigenous chickens
- ☐ No other animals/animal house
- ☐ Pig
- ☐ Rabbits
- ☐ Sheep
- ☐ Turkeys

Now, ASK THE RESPONDENT TO GO GET THE MEDICINE THEY USE

**186) Take photo of frontal view of the MAIN layer house**

Click here to upload file. (< 10MB)

**187) Record GPS of house**

latitude (x.y °)

---

longitude (x.y °)

---

altitude (m)

---

accuracy (m)

---

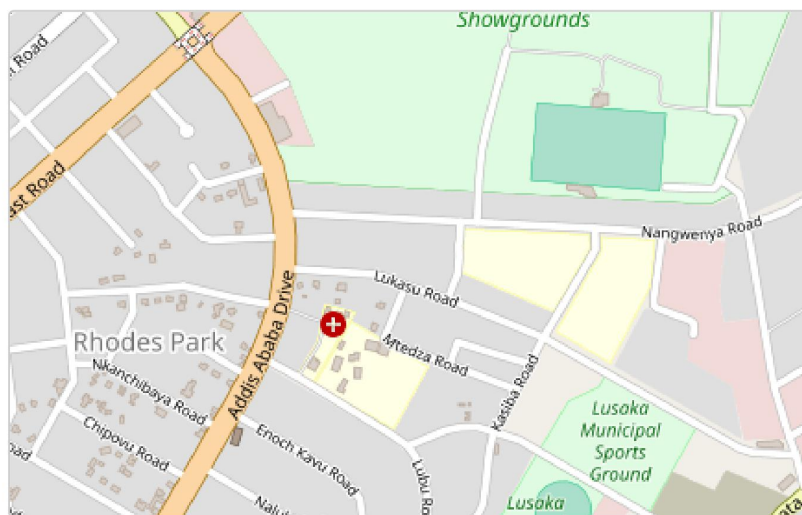

**Show them the posters and ask what medicines they normally use**

- ☐ 100 grams Bimeda
- ☐ Aliseryl Bottle
- ☐ Aliseryl Sachet
- ☐ AMNIN'TOTAL SACHET
- ☐ AMNIN'TOTAL BOTTLE
- ☐ Amoxicilina 500 mg/g
- ☐ AMOXY-COL WSP SACHET
- ☐ AMPROCOX BOTTLE
- ☐ AMPROCOX SACHET
- ☐ Amprolium 250 WSP
- ☐ Amprolium 20%
- ☐ Antibact
- ☐ Ashoxy 20% Sachet
- ☐ Ashoxy egg
- ☐ Biospark-Y
- ☐ Colistina 3000
- ☐ Colistine-Sulphate Soluble Powder Sachet
- ☐ CRD Stop Sachet
- ☐ CRD Powder
- ☐ Diamond MVS Broiler Boost
- ☐ Doxin
- ☐ Egocin Powder
- ☐ Enrocoli 10% Oral Solution
- ☐ Intertrim 400
- ☐ Layers Extra Sachet
- ☐ Levasol 200 WSP Sachet
- ☐ Magic Boost mayai
- ☐ Neo-oxy egg formula
- ☐ Neo-oxy vitamin wsp bottle
- ☐ Neo-oxy vitamin wsp sachet
- ☐ Nemovit Bottle
- ☐ Nemovit Sachet
- ☐

- ☐ Oxysol Plus
- ☐ Oxytetracycline 50% soluble powder
- ☐ Piperazine Sachet
- ☐ Super Egg Formula Plus
- ☐ Tetraoxy Chick Formula Sachet
- ☐ Tetracolivit Sachet
- ☐ Tylo 200 WSP
- ☐ Tylodox Extra WSP
- ☐ Tylosin 75%
- ☐ WS (Multivits)
- ☐ WS (antibiotics)
- ☐ Venlyte Powder sachet
- ☐ Vetoxy 20
- ☐ Vetpro Magic Boost
- ☐ Vigal 2X Sachet
- ☐ Vitamit-Egg Extra

**188) We would like to collect fecal samples at a later date. We would collect fecal samples from poultry, swabs, and water. We will follow best protocol for entering the poultry house. Would it be okay if we came back?**

- ☐ Yes
- ☐ No

#### **closing**

Tell the informant that you appreciate their time and that their responses will help us succeed in our project.

Also tell them that after analyzing the results we will come and talk to them about what we found and get their input on interventions to improve health of their birds.

REMEMBER to write their last name and ID on next page. For example Caudell\_100
